# Visceral Fat Inflammation and Fat Embolism are associated with Lung's Lipidic Hyaline Membranes in COVID-19 patients

Georgia Colleluori<sup>1,\*</sup>, Laura Graciotti<sup>2,\*</sup>, Mauro Pesaresi<sup>3</sup>, Angelica Di Vincenzo<sup>1</sup>, Jessica Perugini<sup>1</sup>, Eleonora Di Mercurio<sup>1</sup>, Sara Caucci<sup>4</sup>, Patrizia Bagnarelli<sup>4</sup>, Cristina M. Zingaretti<sup>1</sup>, Enzo Nisoli<sup>5</sup>, Stefano Menzo<sup>4</sup>, Adriano Tagliabracci<sup>3</sup>, Annie Ladoux<sup>6</sup>, Christian Dani<sup>6</sup>, Antonio Giordano<sup>1</sup> and Saverio Cinti<sup>1</sup>

<sup>1</sup> Center for the Study of Obesity, Department of Experimental and Clinical Medicine, Marche Polytechnic University, via Tronto 10A, Ancona, Italy

<sup>2</sup> Section of Experimental Pathology, Department of Clinical and Molecular Sciences, Marche Polytechnic University, via Tronto 10A, Ancona, Italy

<sup>3</sup> Section of Legal Medicine, Department of Bioscience and Public Health, Marche Polytechnic University, via Tronto 10A, Ancona, Italy

<sup>4</sup> Section of Microbiology, Department of Bioscience and Public Health, Marche Polytechnic University, via Tronto 10A, Ancona, Italy

<sup>5</sup> Center for Study and Research on Obesity, Department of Medical Biotechnology and Translational Medicine, University of Milan, via Vanvitelli 32, Milan, Italy

<sup>6</sup> Université Côte d'Azur, CNRS, Inserm, iBV, Faculté de Médecine, 06107 Nice Cedex 2, France

\* Authors contributed equally

Correspondence to:

Saverio Cinti MD  
Scientific Director, Center of Obesity  
Marche Polytechnic University  
Via Tronto 10a  
60020 Ancona, Italy  
(0039) 071 220 6088

[cinti@univpm.it](mailto:cinti@univpm.it)  
[saverio.cinti@icloud.com](mailto:saverio.cinti@icloud.com)

Key words: SARS-CoV2, visceral adipose tissue, obesity, inflammation, pulmonary embolism, pneumonia.

43 **Abstract**

44 Background: Visceral obesity is a critical determinant of severe coronavirus disease-2019 (COVID-  
45 19). Methods: In this study, we performed a comprehensive histomorphologic analysis of autptic  
46 visceral adipose tissues (VAT), lungs and livers of 19 COVID-19 and 23 non-COVID-19 subjects.  
47 Results: Although there were no between-groups differences in body-mass-index and adipocytes size,  
48 higher prevalence of CD68+ macrophages in COVID-19 subjects' VAT was detected (p=0.005) and  
49 accompanied by crown-like structures presence, signs of adipocytes stress and death. Consistently,  
50 human adipocytes were successfully infected by SARS-CoV2 *in vitro* and displayed lower cell  
51 viability. Being VAT inflammation associated with lipids spill-over from dead adipocytes, we studied  
52 lipids distribution employing Oil-Red-O staining (ORO). Lipids were observed within lungs and  
53 livers interstitial spaces, macrophages, endothelial cells, and vessels' lumen, features suggestive of  
54 fat embolism syndrome, more prevalent among COVID-19 individuals (p<0.001). Notably, signs of  
55 fat embolism were more prevalent among obese (p=0.03) independently of COVID-19 diagnosis,  
56 suggesting that such condition may be an obesity complication, exacerbated by SARS-CoV2  
57 infection. Importantly, all infected subjects' lungs presented lipids-rich (ORO+) hyaline membranes,  
58 formations associated with COVID-19-related pneumonia, present only in one control with non-  
59 COVID-19 pneumonia. Conclusions: This study describes for the first time novel COVID-19-related  
60 features possibly underlying the unfavorable prognosis in obese SARS-CoV2-infected-subjects.

61  
62  
63  
64  
65  
66  
67  
68  
69  
70  
71  
72  
73  
74

## 75 **Introduction**

76 Since December 2019, the severe acute respiratory syndrome coronavirus 2 (SARS-CoV2),  
77 responsible for the development of coronavirus disease 2019 (COVID-19), has spread globally  
78 resulting in a worldwide health crisis that caused over four million deaths (1). The lung is a crucial  
79 target organ not only due to the severe bilateral pneumonia observed in 15-30% of hospitalized  
80 patients (2, 3), but also because it is the site from which the infection spreads to blood vessels, heart,  
81 gut, brain, and kidneys (4). Published data support interstitial fibrosis with alveolar hyaline membrane  
82 (HM) formation as the main underlying histopathologic event responsible for pneumonia and acute  
83 respiratory syndrome distress (5, 6). The reasons for HM bilateral expression, histogenesis, and  
84 sudden clinical appearance during COVID-19 early stages are not completely understood (7).  
85 The severity of COVID-19 is strictly associated with the presence of comorbidities (8); while obesity  
86 alone is responsible for 20% of COVID-19 hospitalizations, obesity in combination with type 2  
87 diabetes and hypertension accounts for 58% (9). Obesity and impaired metabolic health are in fact  
88 strongly associated with COVID-19 unfavorable prognosis and pose also young patients at higher  
89 risks (10, 11). Importantly, visceral obesity increases the risk of COVID-19-related complications,  
90 independently of age, gender, body mass index (BMI), total and subcutaneous adipose tissue areas  
91 (12-15). Visceral obesity is in fact strongly associated with chronic low-grade inflammation, blood  
92 hypercoagulability, impaired metabolic health, and higher risk of cardiovascular events, all risk  
93 factors for COVID-19 severity (8, 11, 15-17). Visceral adipose tissue (VAT) excessive expansion is  
94 paralleled by adipocytes hypertrophy, death, and lipids spill-over, phenomena resulting in  
95 macrophages infiltration, crown-like structures (CLS) development and inflammation, in turn  
96 contributing to the obesity-related complications (18-20). The elevated adipocytes ACE2 expression  
97 in obesity (21), receptor exploited by SARS-CoV2 for cell entry, has been often speculated as a  
98 possible pathophysiological mechanism responsible for obesity-related COVID-19 severity (8, 22,  
99 23). However, although obesity has been strongly associated with COVID-19 severity (but not higher  
100 infection rates), original articles comprehensively analyzing adipose tissue samples belonging to

101 COVID-19 subjects and providing direct evidence of SARS-CoV2 infection are lacking (15). In our  
102 preliminary study, we observed the presence of fat embolism in a COVID-19 subjects with obesity,  
103 a phenomenon that we hypothesized could derive from adipose tissue stress induced by SARS-CoV2  
104 and explain COVID-19 severity in obesity (22). In the present study we perform for the first time a  
105 comprehensive histomorphological assessment of visceral adipose tissue, lung, and liver autoptic  
106 samples belonging to COVID-19 and non-COVID-19 subjects, and specifically focusing on tissues  
107 lipids distribution. We observed novel SARS-CoV2-related histopathological features *i.e.*, visceral  
108 adipose tissue inflammation, signs of fat embolism and lung's hyaline membranes of lipidic nature,  
109 possibly contributing to the severity of COVID-19 among subjects with visceral obesity.

110

## 111 **Materials and methods**

### 112 *Study Approval*

113 We followed the report “Research ethics during COVID-19 pandemic: observational, and in  
114 particular, epidemiological studies” published by the Italian *Istituto Superiore di Sanità* on May 2020  
115 (Rapporto ISS COVID-19, n. 47/2020) (37). Given the observational (cross-sectional, case-control)  
116 nature of our study which was conducted on autoptic specimens and did not entail neither an  
117 intervention, nor the collection of subject's sensitive information, we have not obtained an informed  
118 consent. Our study did not entail any physical risk for the subjects. In Italy, the evaluation of non-  
119 pharmacological observational studies is not governed by the same normative references provided for  
120 the evaluation of clinical trials and observational studies concerning drugs. Furthermore, as reported  
121 in the above report (37) in the section dedicated to our type of study *in conditions of pandemic and*  
122 *therefore of high risk for the communities, some administrative steps may be abolished*. Therefore,  
123 our Institutional Review Board does not require an ethical approval for studies conducted on autoptic  
124 specimens and not collecting personal or sensitive data.

### 125 *Study subjects and tissue sampling*

126 Autoptic lung, liver, and visceral adipose tissue samples of 49 subjects were collected at the  
127 Department of Legal Medicine of the Ospedali Riuniti of Ancona between March 2020 and May  
128 2021. Twenty-four subjects were affected by COVID-19, while the remaining 25 were not and died  
129 for different reasons. SARS-CoV2 infection was assessed in all subjects by RT-PCR tests on  
130 nasopharyngeal swab. Subjects were included in the analyses only if their lung's samples were well  
131 preserved such that a high-quality histological assessment could be performed. We hence analysed  
132 19 COVID-19 cases and 23 controls. Among the studied subjects, 15 had documented respiratory  
133 conditions *-i.e.*, pneumonia, dyspnoea, respiratory distress- (10 COVID-19 and 5 controls), 15 had  
134 documented hypertension (7 COVID-19 and 8 controls), 11 suffered from type 2 diabetes (6 COVID-  
135 19 and 5 controls) and 10 from cardiovascular diseases (2 COVID-19 and 8 controls). Visceral  
136 adipose tissue was sampled from the omentum and mesentery region. Lungs were extensively  
137 sampled across central and peripheral regions of each lobe bilaterally. A median of seven tissue  
138 blocks (range five to nine) were taken from each lung. Liver samples were collected from the right  
139 and left lobe.

140 Samples were sliced into different pieces to be studied by light microscopy (LM) and  
141 transmission electron microscopy (TEM). A comprehensive methodological description for such  
142 methodologies has been described elsewhere (38).

#### 143 *Immunohistochemistry and morphometric analyses*

144 The collected visceral (omental) adipose tissue, lung and liver autopsies were fixed overnight at 4°C  
145 in 4% paraformaldehyde. Samples were then embedded in paraffin to be studied by LM and to  
146 perform immunohistochemistry and morphometric analyses. For each sample, 3 µm paraffin sections  
147 were obtained and used for immunohistochemical analyses. A comprehensive description of the  
148 protocol has been described elsewhere (38). To detect the presence of CD68+ macrophages in VAT  
149 samples, we used CD68 (Dako #M0814; dilution 1:200; antigen retrieval method by citrate buffer  
150 pH6) antibody. To study SARS-CoV2 presence in VAT, we used the SARS-CoV2 nucleocapsid  
151 (Invitrogen #MA-17404) and spike protein (Sino Biological #40150-T62) antibodies at different

152 dilutions. The same antibodies were used to detect the virus on infected VeroE6 at dilution: 1:1000  
153 for nucleocapsid protein and 1:100 for the spike protein. To assess antibody specificity, negative  
154 control in which primary antibody was omitted were always included in each set of reaction. Tissue  
155 sections were observed with a Nikon Eclipse E800 light microscope. For morphometric purposes, for  
156 each paraffin section, 10 digital images were acquired at 20X magnification with a Nikon DXM 1220  
157 camera. CD68 positive macrophages widespread in VAT parenchyma and those organized to form  
158 CLS were counted in all images. For each subject the number of total macrophages and the density  
159 of CLS/10<sup>4</sup> adipocytes were counted with the ImageJ morphometric program (RRID:SCR\_003070).  
160 Adipocytes' area was measured in all patients by counting 100 adipocytes for each paraffin tissue  
161 section using ImageJ.

#### 162 *Histochemical staining*

163 For Oil Red-O (ORO) staining samples were cryoprotected in 30% sucrose overnight, embedded in  
164 the optimal cutting temperature (OCT) compound medium, and then sliced to obtain 7 µm- thick  
165 cryosections by Leica CM1900 cryostat (Vienna, Austria). ORO staining was then performed on  
166 lungs (43) and liver (n=9) cryosections. In brief, dried cryosections were first placed in 60%  
167 isopropanol, then in filtrated Oil-Red O working solution (15 minutes at room temperature) and  
168 briefly washed again in 60% isopropanol and lastly in H<sub>2</sub>O. Tissue slices were then counterstained  
169 with hematoxylin and cover with a coverslip using Vectashield mounting medium (Vector  
170 Laboratories). Lung and liver tissues organization and morphology were also studied by hematoxylin  
171 & eosin (H&E) staining on paraffin sections. Lung's hyaline membranes presence and  
172 characterization were performed on paraffin sections by H&E, periodic acid-Schiff and Masson  
173 trichome staining.

#### 174 *Transmission electron microscopy*

175 For ultrastructural analyses, 3-mm thick VAT (n=4), lung (n=7) and liver (n=1) samples were further  
176 fixed in 2% glutaraldehyde-2% paraformaldehyde in 0.1 M phosphate buffer (pH 7.4) and post-fixed

177 in Osmium Tetroxide 1% then embedded in epoxy resin for TEM studies as described elsewhere (38).  
178 Cell pellets from the *in vitro* studies were similarly fixed in 2% glutaraldehyde-2% paraformaldehyde  
179 in 0.1 M phosphate buffer (pH 7.4) for one hour at room temperature and then embedded in epoxy-  
180 resin. A MT-X ultratome (RMC; Tucson) was used to obtain ultrathin sections (~70 nm).  
181 Ultrastructural characterization was performed on all samples using a CM10 Philips transmission  
182 electron microscope (Philips, Eindhoven, The Netherlands, <http://www.usa.philips.com>).

### 183 *Statistical analysis*

184 Between-group comparisons for linear and categorical variables were determined by unpaired two-  
185 tailed Student's t-test and Chi-square test, respectively. Group differences were considered significant  
186 when  $p < 0.05$ . Data in graph are expressed as mean  $\pm$  SEM. Statistical analyses were performed with  
187 Prism 6.0 (GraphPad Software Inc., La Jolla, CA) and IBM SPSS Statistics Data Editor (v.24).

### 188 *SARS-CoV2 infection in VeroE6*

189 Vero E6 cells were cultured in Dulbecco's modified Eagle medium (DMEM, Euroclone, Milano,  
190 Italy), supplemented with 10% fetal calf serum (FCS Euroclone) and antibiotics/antimycotic (100  
191 U/ml penicillin, 100  $\mu$ g/ml streptomycin, 0.25  $\mu$ g/ml amphotericin B) at 37°C, 5% CO<sub>2</sub> in a  
192 humidified atmosphere (90%), as described previously (39). Cells were maintained in 75 cm<sup>2</sup> tissue  
193 culture flasks. The day before infection, a confluent monolayer was trypsinized, and 1.5 x 10<sup>6</sup> cells  
194 were seeded in every 8 flasks (25 cm<sup>2</sup>). Confluent monolayers were infected with SARS CoV-2  
195 (78952 isolate, accession no. MT483867) (40) at a multiplicity of infection (MOI) of 3.29·10<sup>5</sup>. After  
196 2 hours of incubation, the medium containing the inoculum was removed, the cells were washed  
197 twice, and fresh medium was added, which was collected after 6, 12, 24 and 48 h for viral genome  
198 quantification and replaced with 2 ml of fresh culture medium to allow scraping of the infected  
199 monolayer. Uninfected cell monolayer controls were treated as infected ones. Cell suspensions (2ml)  
200 were subsequently centrifuged at 800 rpm for 5 minutes. Aliquots of infected supernatants, collected  
201 as above, were analyzed using RT-qPCR assay as described elsewhere (40). Briefly, 5  $\mu$ l of RNA

202 extracted from 140 µl of infected supernatants were run together with a calibration curve, obtained  
203 from 10-fold dilutions of a standard plasmid certified and quantified by a supplier (2019-nCoV  
204 Positive Control, nCoVPC, 85 IDT) and negative control, applying a protocol described by CDC  
205 (<https://www.fda.gov/media/134922/download>).

#### 206 *In vitro studies on hMADS*

207 Ethical Approval: Human adipocytes progenitors -Aps- (hMADS cells) were isolated from adipose  
208 tissue, as surgical scraps from surgical specimen of various surgeries of young donors, with the  
209 informed consent of the parents. All methods were approved and performed in accordance with the  
210 guidelines and regulations of the Centre Hospitalier Universitaire de Nice Review Board.

211 *Cell Differentiation*- hMADS cells were maintained and differentiated as previously described (41).  
212 They will be further referred to as hMADS-adipocytes. They were routinely tested for the absence of  
213 mycoplasma. Treatments and biological assays were carried out in duplicates on control or  
214 differentiated hMADS cells from day 4 to 18.

215 *Gene expression analysis*- Total RNA was extracted using the TRI-Reagent kit (Euromedex,  
216 Soufflweyersheim, France) and reverse transcription (RT) was performed using MMLV reverse  
217 transcriptase (Promega, Charbonnieres, France), as recommended by the manufacturers. All primer  
218 sequences are described in the supplementary section. Real-time PCR assays were run on an ABI  
219 Prism One step real-time PCR machine (Applied Biosystems, Courtaboeuf, France). Normalization  
220 was performed using *36B4* as a reference gene. Quantification was performed using the comparative  
221 Ct method. The results are shown as mean  $\pm$  standard error of the mean (SEM), with the number of  
222 experiments indicated. Statistical significance was determined by *t*-tests BiostaTGV (INSERM and  
223 Sorbonne University, PARIS, France). Probability values  $<0.05$  were considered statistically  
224 significant and are marked with a single asterisk,  $<0.01$  with double asterisks and  $<0.001$  with triple  
225 asterisks. Sequences for the primers used in this study *ACE2* (FW 5'-  
226 AGAACCTGGACCCTAGCAT -3'; REV 5'- AGTCGGTACTCCATCCCACA -3'); *BASIGIN* (FW: 5'-



227 CAGAGTGAAGGCCGTGAAGT -3'; REV: 5'ACTCTGACTTGCAGACCAGC-3'); *NRPI* (FW: 5'-  
228 GGGGCTCTCACAAGACCTTC 3'; REV: 5'- GATCCTGAATGGGTCCCGTC -3'); *CSTL* (FW: 5'-  
229 CTGGTGGTTGGCTACGGATT -3'; REV: 5'- CTCCGGTCTTTGGCCATCTT -3'); *FURIN*  
230 (FW:5'-CTACAGCAGTGGCAACCAGA-3'; REV:5'- TGTGAGACTCCGTGCACTTC-  
231 3'); *36B4* (FW: 5'- CTACAACCCTGAAGAAGTGCTTG -3'; REV: 5'-  
232 CAATCTGCAGACAGACTGG -3'); *DPP4* (SINO biologicals Inc. #HP100-649 (Eschborn,  
233 Germany)

234 *hMADS Sars-CoV2 infection*- hMADS and hMADS adipocytes cells were infected with viral stock  
235 of SARS-CoV2 (EPI\_ISL\_417491), at a 50% Tissue Culture Infectious Dose (TCID<sub>50</sub>) of 2000  
236 TCID<sub>50</sub>/ml for 2 hours at a temperature of 37°C. Following incubation, the medium containing the  
237 inoculum was removed, the cells were washed twice, and the medium was supplemented with  
238 different specific compounds. Supernatants were collected at 24, 48, 72, 96 hours for viral genome  
239 quantification and medium renewal was performed at each sampling time. Uninfected cell monolayer  
240 controls were treated as the infected ones. Supernatants, collected as above, and cell pellets, collected  
241 at 96 hours post-infection, were analyzed using RT-qPCR as described in the VeroE6 cell section.

242 *Cell Viability Assay* (MTT Assay)- The effect of SARS-CoV2 infection on cell viability of hMADS  
243 adipocytes was measured using the metabolic dye [4,5-dimethylthiazol-2-yl]-2,5-diphenyl  
244 tetrazolium (MTT) (Sigma, St. Louis, MO, USA). Briefly, hMADS cells were seeded in 96 well  
245 plates at a density of 4,500 cells/cm<sup>2</sup>, differentiated and then infected with viral stock of SARS-CoV2  
246 for 2h at 37 °C. Following the incubation with the virus, cells were placed in supplemented medium.  
247 Time-course analyses of cell survival were determined at 24, 48, 72 and 96h. After the incubation  
248 period, the media were replaced with 100 µL MTT (0.5 mg/mL) dissolved in PBS and incubated for  
249 3 h. MTT-containing medium was removed and 100 µl of dimethyl sulfoxide (DMSO) was added to  
250 dissolve formazan crystals formed by live cells. Absorbance was subsequently measured at 570 nm  
251 using a BioTek Synergy HTX microplate reader (BioTek, Winooski, VT, USA). Results were  
252 expressed as percentages of viable cells relative to uninfected controls.

253 *Nuclear morphology analyses*- Alterations in nuclear morphology were determined by assessment of  
254 nuclear staining using fluorescent stains and fluorescent microscopy (42).  
255 For these experiments, hMADS adipocytes were differentiated in 2-well Lab-Tek Chamber Slides  
256 (Nalge Nunc International, Naperville, IL, USA), washed with PBS pH 7.4 and fixed with 10%  
257 paraformaldehyde in PBS for 10 min at RT. After washing with PBS, nuclear staining was performed  
258 with Hoechst. Finally, cells were airdried and cover-slipped using Vectashield mounting medium  
259 (Vector Laboratories, Burlingame, CA, USA) and analyzed by fluorescent microscopy. The number  
260 of altered nuclei were counted (in the field displaying nuclear fragmentation, nuclear condensation)  
261 and divided by the total number of nuclei and multiply by 100. Observations were carried out by  
262 Lucia IMAGE 4.82, Laboratory Investigations Morphometric Analyses.

263 *Lipid droplet size* ( $\mu\text{m}^2$ ) was measured on SARS-CoV2 infected hMADS adipocytes and in untreated  
264 controls. For this purpose, we used a drawing tablet and a morphometric program (Nikon LUCIA  
265 IMAGE, Laboratory Imaging, version 4.61; Praha, Czech Republic). hMADS adipocytes were  
266 examined with a Nikon Eclipse Ti-S inverted light microscope (Nikon Instruments S.p.A, Calenzano,  
267 Italy), and digital images were captured at 20X with a Nikon DS-L2 camera (Nikon Instruments  
268 S.p.A, Calenzano, Italy). Five random fields were analyzed and at least 1700 lipid droplets were  
269 measured for each sample, and the difference between infected and non-infected cells was assessed  
270 by unpaired t-test. Similarly, the quantitative assessment of the material extruded from the hMADs  
271 was calculated using the same microscope and software and expressed as the number of vacuoles  
272 extruded from the cells on the total cell amount.

273

## 274 **Results**

275 Autoptic VAT, lung and liver samples belonging to 49 subjects were collected and screened  
276 to be included in the study. Forty-two subjects were considered suitable for the study (good-  
277 preservation for histomorphological analyses), 19 of which died due to COVID-19-related bilateral  
278 pneumonia (COVID-19 group), while the remaining 23 died for different reasons (control group).

279 Subjects' characteristics, including gender, age, BMI, comorbidities, and cause of death are reported  
280 in supplementary table 1 and 2. SARS-CoV2 infection was assessed by RT-qPCR performed on nasal  
281 pharyngeal or pharyngeal swab samples. Study population mean age was  $65.0 \pm 14.3$  years old, BMI  
282 was  $29.0 \pm 5.4$  kg/m<sup>2</sup> with 35.7% of patients suffering from obesity ( $BMI \geq 30.0$  kg/m<sup>2</sup>), and 45.2%  
283 being overweight ( $BMI \geq 25.0$  kg/m<sup>2</sup>). Thirty-five % of the population was composed of woman  
284 (n=15). There were no significant differences in mean age (COVID-19:  $69.5 \pm 11.0$  vs controls:  
285  $61.0 \pm 16.0$  years old; p=0.09) and BMI (COVID-19:  $30.0 \pm 5.0$  vs controls:  $28.1 \pm 5.6$  kg/m<sup>2</sup>; p=0.62)  
286 between our study groups.

287 Unequivocal signs of chronic, low-grade inflammation in both COVID-19 and control  
288 subjects with a  $BMI \geq 25.0$  kg/m<sup>2</sup> were observed in VAT samples (Fig.1A). However, although there  
289 were no between-groups differences in BMI and VAT adipocytes size (Fig.1B), higher prevalence of  
290 CD68+ macrophages (Fig.1C) and a trend for higher presence of CLS (Fig.1D) were evidenced in  
291 COVID-19 patients compared to controls, suggesting higher SARS-CoV2-induced VAT  
292 inflammation. Other inflammatory cells were represented mainly by lymphocytes, but their number  
293 was negligible in all investigated cases.

294 We then assessed whether the higher VAT inflammation in COVID-19 patients was  
295 associated with adipocytes death. Perilipin 1 (PLIN1) immunohistochemistry is a reliable method for  
296 identification and quantification of dead adipocytes (18, 24). However, in the present study, all  
297 samples display PLIN1 negative adipocytes, probably due to the autaptic nature of specimens. We  
298 hence performed a morphologic and ultrastructural study to assess VAT adipocytes stress and death.  
299 Electron microscopy showed signs of adipocytes death in proximity of CLS in both COVID-19 and  
300 controls subjects with a  $BMI \geq 25$  kg/m<sup>2</sup>, a finding consistent with previous studies documenting  
301 obesity-related adipocytes death (25). However, COVID-19 subjects VAT was rich in stressed and  
302 dead adipocytes (Fig. 1E-F) also in areas lacking CLS and seemingly normal at light microscopy. In  
303 line with the observed widespread death, cell remnants were evidenced in closed proximity of dying  
304 adipocytes, while free lipid droplets were often found in fat interstitial spaces (Fig.1F and 1G).

305 Notably, large lipid vacuoles were also observed: *i.* inside endothelial cells belonging to capillaries  
306 adjacent to free lipid droplets (Fig.1H and Fig.1I); *ii.* extruding from endothelial cells into the  
307 capillary lumen (Fig.1I); *iii.* in the lumen of VAT capillaries (Fig.1J); *iv.* in macrophages near  
308 interstitial free lipid droplets (data not shown). In addition, several clusters of lipid-rich structures  
309 were found into the lumen of venules belonging to mesenteric fat samples (Fig.1K). In summary, the  
310 in-depth ultrastructural analyses of VAT autoptic samples belonging to COVID-19 subjects revealed  
311 the widespread presence of free lipid droplets (likely deriving from dead adipocytes) inside the  
312 capillary lumen, all features underlining a condition able to generate fat embolism syndrome (FES)  
313 (26).

314 We then aimed at assessing whether the observed VAT alterations were associated with  
315 SARS-CoV2 local-tissue presence or if they were a consequence of the systemic infection. Although  
316 SARS-CoV2 ability to infect human adipose tissue has been frequently speculated (8, 12, 17, 22),  
317 direct evidence of such phenomenon has not been documented in the literature (15), with only one  
318 study reporting the presence of the virus in mediastinal fat (27). While SARS-CoV2 genomic RNA,  
319 nucleocapsid and spike proteins were not detectable in VAT samples of COVID-19 subjects, virus-  
320 like structures with morphology and size resembling the those present in SARS-CoV2 infected  
321 VeroE6 cells (Fig. 2A) were found in the cytoplasm of stressed adipocytes (Fig.2B). Furthermore,  
322 the presence of ribosome-like clusters, described in virus-infected cells (28) was evidenced in both,  
323 visceral adipocytes belonging to COVID-19 subjects (Fig. 2C and 2D) and SARS-CoV2-infected  
324 VeroE6 (Fig. 2E). In addition, confronting cisternae, ribosome lamella complex and annulate  
325 lamellae, typical of several pathologic conditions including virus infection (29), were observed in  
326 VAT adipocytes belonging to COVID-19 subjects (Suppl. Fig.1A-D) and in SARS-CoV2 infected  
327 VeroE6 (Suppl. Fig.1E), but not in uninfected controls. Next, to provide direct evidence of SARS-  
328 CoV2 ability to infect human adipocytes, leading to cell stress and death, we infected differentiated  
329 human multipotent adipocytes (hMADS) (Fig. 2F-H) and studied SARS-CoV2 kinetics *in vitro*. The  
330 growth kinetics of SARS-CoV2 was determined as viral load (copies/ml) in the supernatants collected

331 after 24-, 48-, 72- and 96-hours post-infection (Fig. 2F). While SARS-CoV2 genomic RNA was  
332 detectable in both, differentiated and undifferentiated hMADS at the first timepoints post-infection  
333 (24 and 48 h), it could be detected only in mature adipocytes at later timepoints (72 and 96 h) (Fig.  
334 2F). Consistently, SARS-CoV2 genomic RNA was also detected in the hMADS adipocytes pellet  
335 after 96-hours of infection (Fig. 2G). Importantly, infected hMADS adipocytes displayed lower cell  
336 viability (Fig. 2H), higher prevalence of pyknotic nuclei (Fig. 2I-K) and smaller lipid droplet size -  
337 suggestive of cell delipidation and stress- compared to uninfected controls (Fig. 2L). Furthermore, in  
338 line with these data, evidence of increased material extrusion from infected cells were evidenced by  
339 light microscopy ( $p < 0.05$ ) and strongly suggested massive cell delipidation induced by SARS-CoV2  
340 (Suppl. 1F-H). We hence performed a time-course analyses of hMADS expression of putative SARS-  
341 CoV2 receptors (Fig. 2L) and proteases (Fig. 2M) in presence or absence of the adipogenic  
342 differentiation cocktail (at 4, 7, 14 and 18 days). *ACE2* receptor was expressed at very low levels in  
343 both differentiated and undifferentiated hMADS, even though we used specifically designed primers  
344 holding a 100.92% efficiency. On the other side, *BASIGIN* receptor was preferentially detected in  
345 differentiated hMADS which displayed an increased expression after 14 days. The receptor  
346 *NEUROFILIN 1* was expressed by undifferentiated cells. Concerning proteases expression, while  
347 differentiated hMADS expressed the protease *FURIN*, the undifferentiated ones preferentially  
348 expressed *DPPIV*. The expression of *CATHEPSIN L* did not differ between the two conditions, while  
349 we did not detect *TMPRSS2* in both differentiated and undifferentiated hMADS (data not shown).

350         Given our preliminary data (22) and the widespread lipid droplets presence in the capillary  
351 lumen of VAT, also evidenced in some mesenteric adipose depots, we then studied lipid distribution  
352 in lung samples employing Oil-Red O staining (ORO: lipid-specific histochemistry). Lipids were  
353 evidenced within lungs alveolar septa, interstitial spaces, endothelial cells and vessel's lumen and in  
354 alveolar and interstitial macrophages (Fig. 3A-D), all features confirmed by light and electron  
355 microscopy (Fig. 3E-F) and suggestive of fat embolism (21).

356 Lung's fat embolism was not exclusive of, but more prevalent among COVID-19 subjects as  
357 compared to controls (100% vs 53%;  $p < 0.001$ ). Signs of fat embolism were in fact more prevalent  
358 among individuals with obesity than in those with a  $BMI \leq 30$   $kg/m^2$  (93% vs 63%,  $p = 0.03$ ),  
359 independently of COVID-19 diagnosis. Consistently, all subjects with type 2 diabetes (T2DM) had  
360 fat embolism. Of note, electron microscopy observation revealed several structures with size and  
361 morphology compatible with those of SARS-CoV2 viruses (6) in pneumocytes, endothelial cells and  
362 macrophages, the last of which displayed disseminated, dilated endoplasmic reticulum denoting  
363 cellular stress (25, 30) and signs of virus presence only in COVID-19 subjects (Fig. 3G-H).  
364 Furthermore, we also evidenced also two virions at early and late stages of reproductive cycle (31)  
365 into the dilated endoplasmic reticulum (Fig. 3H) comparable with those revealed in infected VeroE6  
366 in Fig. 3I. Importantly, septal capillaries very often contained large amounts of fibrin, with some of  
367 them lining by fibrin-thrombotic material only in COVID-19 individuals' lungs (data not shown).  
368 Several Weibel-Palade bodies, signs of activated coagulative phenomena (29), were observed also in  
369 capillary endothelial cells belonging to COVID-19 subjects (data not shown).

370 Unexpectedly, the ORO technique evidenced also positively stained alveolar structures  
371 reminiscent of hyaline membranes (Fig. 4A). The presence of hyaline membranes was then confirmed  
372 by hematoxylin and eosin, by Mallory and periodic acid-Schiff staining (data not shown). All  
373 COVID-19 subjects presented lung's hyaline membranes, which were on the other side detected only  
374 in one control subject ( $BMI 21.3$   $kg/m^2$ ) who died of pneumonia ( $p < 0.0001$ ). Interestingly, this last  
375 subject displayed fainted lung's hyaline membrane positivity for ORO staining, suggesting a lower  
376 lipidic composition. This finding is consistent with other reports describing hyaline membrane  
377 presence in pneumonia (7). Importantly, ORO positive lipid droplets and lipid-rich macrophages were  
378 often enclosed into the hyaline membranes lining the alveolar surface (Fig. 4B-D). Several aspects  
379 suggesting a direct role of embolic fat in hyaline membranes formation were observed. Specifically,  
380 free lipid droplets occupying the alveolar space and lining and spreading on the alveolar surface were  
381 observed (Fig. 4E-H). The presence of lung's hyaline membranes of lipidic nature was associated

382 with visceral adipose tissue inflammation ( $8.0\pm 5.4$  vs  $3.7\pm 1.8$  CD68+ macrophages/10 adipocytes in  
383 subjects with and without hyaline membranes, respectively) and exclusive of COVID-19 cases  
384 (Suppl. Fig. 2).

385 Lastly, since the embolic material from abdominal visceral tissues should necessarily pass  
386 through the liver parenchyma to reach the lung, we exploited the ORO staining technique to study  
387 liver samples belonging to 9 COVID-19 and 8 control subjects. Liver autoptic samples showed focal,  
388 macrovesicular steatosis with lipid droplets of very variable size (Suppl. Fig. 3A), consistent with  
389 other studies conducted on COVID-19 subjects (32). In particular, signs consistent with fat embolism,  
390 i.e., presence of free lipid droplets into hepatic sinusoids (Suppl. Fig. 3B) and into the vessels' lumen  
391 (Suppl. Fig. 3C-D), as well as clusters of lipid-rich structures in the portal vein (Suppl. Fig. 3D) were  
392 observed in COVID-19 subjects, a finding that confirmed the embolic nature of hepatic fat droplets,  
393 and that support what observed in VAT samples. In summary, 8/9 COVID-19 subjects with  
394 documented lung fat embolism displayed signs of hepatic fat embolism as well. On the other side, we  
395 observed hepatic embolism in an elevated percentage of control subjects (6/8), possibly due to the  
396 elevated prevalence of visceral obesity among these investigated cases.

397

## 398 **Discussion**

399 This is the first study investigating the ultrastructural features of VAT among COVID-19  
400 subjects and assessing lipid distribution in lungs and liver samples by histomorphology. Our data  
401 support the presence of higher local VAT inflammation and higher prevalence of fat embolism and  
402 lipidic hyaline membranes formations in the lungs of subjects dead due to COVID-19 compared to  
403 control individuals' dead for different reasons. In addition, our data support SARS-CoV2 ability to  
404 infect human adipocytes *in vitro*. Considering the strong association between COVID-19 related  
405 complications and obesity, especially with visceral adipose content excess (10-15), the  
406 comprehension of the biological phenomenon at the basis of such association holds critical clinical  
407 implication in the era of the COVID-19 pandemic.

408 Our study provides the first evidence of higher local VAT inflammation among COVID-19  
409 subjects, independently of obesity status and support COVID-19-induced exacerbation of obesity-  
410 related inflammation, a novel finding consistent with studies reporting higher systemic inflammation  
411 among infected patients (17). Adipocyte's inflammation is associated with adipocytes stress, death  
412 and lipids release in the extracellular space (18, 19, 24, 25). We hence studied adipocytes features by  
413 TEM and revealed the presence of the typical signs of cellular stress, together with clear features of  
414 lipids' spill-over from suffering adipocytes. Lipids were in fact detected in the extracellular space,  
415 inside endothelial cells, inside the capillary lumen, and extruding from endothelial cells into the  
416 capillary lumen, all features indicative of fat embolism.

417 Although virus like structures were evidenced by TEM in the same VAT depots, the lack of  
418 SARS-CoV2 detection by qPCR did not allow us to conclude that such inflammation, cellular stress  
419 and death were all related to the presence of this virus. It is in fact possible that the described VAT  
420 features were secondary to the systemic inflammation induced by COVID-19 or due to the presence  
421 of different viruses within the depot. On the other side, we were able to demonstrate that SARS-CoV2  
422 can infect human adipocytes even though neither adipocytes, nor adipocytes progenitors gathered all  
423 the known molecular requirements for the virus entry (expression of all known virus proteases and  
424 receptors). This set of data is in part consistent with other findings and suggest that additional, not  
425 yet characterized, receptors and proteases may be exploited for this purpose (15, 33).

426 Considering the widespread lipid droplets presence in the capillary lumen of VAT and  
427 considering our preliminary data (22), we studied lipid distribution in lung and liver samples and  
428 confirmed the presence of fat embolism. Interestingly, we noticed similar lipid-like structures also in  
429 lung's images from other reports on COVID-19 subjects, reason for which we believe it is worth  
430 performing further in-depth analyses on available samples (5, 6, 34).

431 Fat embolism was prevalent among, but not exclusive of, subjects with COVID-19; it was in  
432 fact detected also among subjects with obesity independently of SARS-CoV2 infection. These data  
433 are not surprising given that adipocyte's death and release of lipids are both phenomena occurring in



434 obesity (18, 24, 25). This finding provides the first evidence pointing out fat embolism as a  
435 complication of obesity (and obesity plus T2DM), determined by adipocytes death and possibly  
436 exacerbated by the COVID-19-induced inflammatory status. Importantly, studying lung's lipid  
437 distribution, we unexpectedly revealed the presence of lipidic hyaline membranes, formation strongly  
438 contributing/associated to COVID-19 related interstitial fibrosis and pneumonia (6). Hyaline  
439 membranes were present in all COVID-19 subjects and in only one control who died for pneumonia,  
440 a finding consistent with other reports describing hyaline membrane presence in pneumonia (7). Our  
441 histomorphologic assessment revealed several aspects indicative of a direct role of embolic fat in  
442 hyaline membranes formation. Consistently, the presence of lung's hyaline membranes of lipidic  
443 nature was associated with visceral adipose tissue inflammation but was exclusive of COVID-19  
444 cases.

445         In summary, in our case series, although fat embolism may be present in condition of obesity  
446 and T2DM independently of COVID-19, the embolic-derived pulmonary lipidic material contribute  
447 to the formation of hyaline membranes only in the case of COVID-19 related pneumonia, a novel  
448 finding that holds critical clinical implications and deserves further investigation. Furthermore, these  
449 data provide significant insight into hyaline membrane nature, as their formation process has not been  
450 characterized yet (35). Additional studies investigating the hyaline membranes nature of non-  
451 COVID-19-related pneumonia are required to detail such histopathological feature.

452         Collectively our data reveal higher local VAT inflammation in COVID-19 subjects and  
453 SARS-CoV2 ability to infect human adipocytes, both elements widely speculated but never  
454 demonstrated in the literature (15, 23). In addition, we provide the first evidence that supports fat  
455 embolism as a complication of obesity, likely determined by adipocytes death and exacerbated by the  
456 COVID-19-induced inflammatory status. Lastly, we reveal for the first time the presence of lung's  
457 lipidic hyaline membranes among all infected subjects, a novel COVID-19-related histopathological  
458 feature associated with visceral adipose tissue inflammation and fat embolism. Consistently, fat  
459 embolism displays similar signs and symptoms as the ones observed in COVID-19, in line with a

460 recently published case report (36). Differential diagnosis, when fat embolism and COVID-19 are  
461 suspected, is hence critical for proper patients' care. Based on our findings, the assessment of fat  
462 embolism symptoms is mandatory in the context of the COVID-19 pandemic, especially among  
463 patients with pulmonary symptoms, obesity and high waist circumference, signs of elevated visceral  
464 adipose accumulation. Such complex clinical status should be therefore adequately assessed and  
465 properly addressed. Our data hold critical clinical implication in the context of obesity disease and  
466 the COVID-19 pandemic and need to be confirmed by additional studies with a larger sample size.

467

468 **Acknowledgment:** This study was funded by Fondo Integrativo Speciale per la Ricerca from the  
469 Italian Ministry of University and Research; grant number: FISR2020IP\_05217, and supported by  
470 Progetti di Rilevante Interesse Nazionale (PRIN 2017, #2017L8Z2) and by Cariplo Foundation to  
471 E.N. (grant 2016-1006).

472 **Author Contribution:** GC, LG, MP, AG, and SC: study conceptualization. GC, LG and SC: study  
473 coordination. MP and AT: collected autoptic samples and clinical data. GC, MP and ADV histological  
474 studies on autoptic samples and cell cultures. CMZ, LG and SC: electron microscopy studies. JP,  
475 EDM, AL and CD: *in vitro* studies on hMADS. SC, PB, SM: SARS-CoV2 infection for the *in vitro*  
476 studies. GC, LG, MP, JP, EN, SM, AG and SC: data analyses and interpretation. All authors approved  
477 the final version of the manuscript and take responsibility for its content.

478 **Competing Interests:** The authors have declared that no conflict of interest exists.

479

480

481

482

483

484

485

## References

- 486  
487  
488 1. Medicine JHU. Coronavirus Resource Center. <https://coronavirus.jhu.edu/map.html>.  
489 Accessed 27th July 2021, 2021.
- 490 2. Mahendra M, Nuchin A, Kumar R, Shreedhar S, and Mahesh PA. Predictors of mortality in  
491 patients with severe COVID-19 pneumonia - a retrospective study. *Adv Respir Med*.  
492 2021;89(2):135-44.
- 493 3. Huang C, Wang Y, Li X, Ren L, Zhao J, Hu Y, et al. Clinical features of patients infected  
494 with 2019 novel coronavirus in Wuhan, China. *Lancet*. 2020;395(10223):497-506.
- 495 4. Wadman M, Couzin-Frankel J, Kaiser J, and Maticic C. A rampage through the body.  
496 *Science*. 2020;368(6489):356-60.
- 497 5. Xu Z, Shi L, Wang Y, Zhang J, Huang L, Zhang C, et al. Pathological findings of COVID-19  
498 associated with acute respiratory distress syndrome. *Lancet Respir Med*. 2020;8(4):420-2.
- 499 6. Bradley BT, Maioli H, Johnston R, Chaudhry I, Fink SL, Xu H, et al. Histopathology and  
500 ultrastructural findings of fatal COVID-19 infections in Washington State: a case series.  
501 *Lancet*. 2020;396(10247):320-32.
- 502 7. Schneider JL, Rowe JH, Garcia-de-Alba C, Kim CF, Sharpe AH, and Haigis MC. The aging  
503 lung: Physiology, disease, and immunity. *Cell*. 2021;184(8):1990-2019.
- 504 8. Stefan N, Birkenfeld AL, and Schulze MB. Global pandemics interconnected - obesity,  
505 impaired metabolic health and COVID-19. *Nat Rev Endocrinol*. 2021;17(3):135-49.
- 506 9. O'Hearn M, Liu J, Cudhea F, Micha R, and Mozaffarian D. Coronavirus Disease 2019  
507 Hospitalizations Attributable to Cardiometabolic Conditions in the United States: A  
508 Comparative Risk Assessment Analysis. *J Am Heart Assoc*. 2021;10(5):e019259.
- 509 10. Williamson EJ, Walker AJ, Bhaskaran K, Bacon S, Bates C, Morton CE, et al. Factors  
510 associated with COVID-19-related death using OpenSAFELY. *Nature*. 2020;584(7821):430-  
511 6.
- 512 11. Onder G, Palmieri L, Vanacore N, Giuliano M, Brusaferrro S, and Italian National Institute of  
513 Health C-MG. Nonrespiratory Complications and Obesity in Patients Dying with COVID-19  
514 in Italy. *Obesity (Silver Spring)*. 2021;29(1):20-3.
- 515 12. Battisti S, Pedone C, Napoli N, Russo E, Agnoletti V, Nigra SG, et al. Computed Tomography  
516 Highlights Increased Visceral Adiposity Associated With Critical Illness in COVID-19.  
517 *Diabetes Care*. 2020;43(10):e129-e30.
- 518 13. Watanabe M, Caruso D, Tuccinardi D, Risi R, Zerunian M, Polici M, et al. Visceral fat shows  
519 the strongest association with the need of intensive care in patients with COVID-19.  
520 *Metabolism*. 2020;111:154319.
- 521 14. Petersen A, Bressen K, Albrecht J, Thiess HM, Vahldiek J, Hamm B, et al. The role of  
522 visceral adiposity in the severity of COVID-19: Highlights from a unicenter cross-sectional  
523 pilot study in Germany. *Metabolism*. 2020;110:154317.
- 524 15. Drucker DJ. Diabetes, obesity, metabolism, and SARS-CoV-2 infection: the end of the  
525 beginning. *Cell Metab*. 2021;33(3):479-98.
- 526 16. Kompaniyets L, Goodman AB, Belay B, Freedman DS, Sucusky MS, Lange SJ, et al. Body  
527 Mass Index and Risk for COVID-19-Related Hospitalization, Intensive Care Unit Admission,  
528 Invasive Mechanical Ventilation, and Death - United States, March-December 2020. *MMWR  
529 Morb Mortal Wkly Rep*. 2021;70(10):355-61.
- 530 17. Morys F, and Dagher A. Poor Metabolic Health Increases COVID-19-Related Mortality in  
531 the UK Biobank Sample. *Front Endocrinol (Lausanne)*. 2021;12:652765.
- 532 18. Cinti S, Mitchell G, Barbatelli G, Murano I, Ceresi E, Faloia E, et al. Adipocyte death defines  
533 macrophage localization and function in adipose tissue of obese mice and humans. *J Lipid  
534 Res*. 2005;46(11):2347-55.
- 535 19. Hotamisligil GS. Inflammation, metaflammation and immunometabolic disorders. *Nature*.  
536 2017;542(7640):177-85.

- 537 20. Colleluori G, and Villareal DT. Aging, obesity, sarcopenia and the effect of diet and exercise  
538 intervention. *Exp Gerontol.* 2021;155:111561.
- 539 21. Gupte M, Boustany-Kari CM, Bharadwaj K, Police S, Thatcher S, Gong MC, et al. ACE2 is  
540 expressed in mouse adipocytes and regulated by a high-fat diet. *Am J Physiol Regul Integr*  
541 *Comp Physiol.* 2008;295(3):R781-8.
- 542 22. Cinti S, Graciotti L, Giordano A, Valerio A, and Nisoli E. COVID-19 and fat embolism: a  
543 hypothesis to explain the severe clinical outcome in people with obesity. *Int J Obes (Lond).*  
544 2020;44(8):1800-2.
- 545 23. Shin J, Toyoda S, Nishitani S, Fukuhara A, Kita S, Otsuki M, et al. Possible Involvement of  
546 Adipose Tissue in Patients With Older Age, Obesity, and Diabetes With Coronavirus SARS-  
547 CoV-2 Infection (COVID-19) via GRP78 (BIP/HSPA5): Significance of Hyperinsulinemia  
548 Management in COVID-19. *Diabetes.* 2021.
- 549 24. Murano I, Barbatelli G, Parisani V, Latini C, Muzzonigro G, Castellucci M, et al. Dead  
550 adipocytes, detected as crown-like structures, are prevalent in visceral fat depots of genetically  
551 obese mice. *J Lipid Res.* 2008;49(7):1562-8.
- 552 25. Camastra S, Vitali A, Anselmino M, Gastaldelli A, Bellini R, Berta R, et al. Muscle and  
553 adipose tissue morphology, insulin sensitivity and beta-cell function in diabetic and  
554 nondiabetic obese patients: effects of bariatric surgery. *Sci Rep.* 2017;7(1):9007.
- 555 26. Meng Y, Zhang M, Ling H, Huang S, Miao Q, Yu Y, et al. Nontraumatic Multiple-Organ Fat  
556 Embolism: An Autopsy Case and Review of Literature. *Am J Forensic Med Pathol.*  
557 2020;41(2):131-4.
- 558 27. Hirschbuhl K, Dintner S, Beer M, Wylezich C, Schlegel J, Delbridge C, et al. Viral mapping  
559 in COVID-19 deceased in the Augsburg autopsy series of the first wave: A multiorgan and  
560 multimethodological approach. *PLoS One.* 2021;16(7):e0254872.
- 561 28. Goldsmith CS, Tatti KM, Ksiazek TG, Rollin PE, Comer JA, Lee WW, et al. Ultrastructural  
562 characterization of SARS coronavirus. *Emerg Infect Dis.* 2004;10(2):320-6.
- 563 29. Ghadially F. *Ultrastructural Pathology of the Cell and Matrix.* 1997.
- 564 30. Giordano A, Murano I, Mondini E, Perugini J, Smorlesi A, Severi I, et al. Obese adipocytes  
565 show ultrastructural features of stressed cells and die of pyroptosis. *J Lipid Res.*  
566 2013;54(9):2423-36.
- 567 31. Perlman S, and Netland J. Coronaviruses post-SARS: update on replication and pathogenesis.  
568 *Nat Rev Microbiol.* 2009;7(6):439-50.
- 569 32. Lagana SM, Kudose S, Iuga AC, Lee MJ, Fazlollahi L, Remotti HE, et al. Hepatic pathology  
570 in patients dying of COVID-19: a series of 40 cases including clinical, histologic, and  
571 virologic data. *Mod Pathol.* 2020;33(11):2147-55.
- 572 33. Puray-Chavez M, LaPak KM, Schrank TP, Elliott JL, Bhatt DP, Agajanian MJ, et al.  
573 Systematic analysis of SARS-CoV-2 infection of an ACE2-negative human airway cell. *Cell*  
574 *Rep.* 2021;36(2):109364.
- 575 34. Konopka KE, Nguyen T, Jentzen JM, Rayes O, Schmidt CJ, Wilson AM, et al. Diffuse  
576 alveolar damage (DAD) resulting from coronavirus disease 2019 Infection is Morphologically  
577 Indistinguishable from Other Causes of DAD. *Histopathology.* 2020;77(4):570-8.
- 578 35. Wellman TJ, de Prost N, Tucci M, Winkler T, Baron RM, Filipczak P, et al. Lung Metabolic  
579 Activation as an Early Biomarker of Acute Respiratory Distress Syndrome and Local Gene  
580 Expression Heterogeneity. *Anesthesiology.* 2016;125(5):992-1004.
- 581 36. Alexa AL, and Onutu AH. Fat Embolism Syndrome Mimicking a COVID-19 Infection. *Case*  
582 *Rep Crit Care.* 2021;2021:5519812.
- 583 37. ISS. Istituto Superiore di Sanità-Research ethics during the COVID-19 pandemic:  
584 observational and, in particular, epidemiological studies. 2020;47/2020.
- 585 38. Cinti S, Zingaretti MC, Cancellato R, Ceresi E, and Ferrara P. Morphologic techniques for the  
586 study of brown adipose tissue and white adipose tissue. *Methods Mol Biol.* 2001;155:21-51.

- 587 39. de Wilde AH, Raj VS, Oudshoorn D, Bestebroer TM, van Nieuwkoop S, Limpens R, et al.  
588 MERS-coronavirus replication induces severe in vitro cytopathology and is strongly inhibited  
589 by cyclosporin A or interferon-alpha treatment. *J Gen Virol.* 2013;94(Pt 8):1749-60.
- 590 40. Alessandrini F, Caucci S, Onofri V, Melchionda F, Tagliabracci A, Bagnarelli P, et al.  
591 Evaluation of the Ion AmpliSeq SARS-CoV-2 Research Panel by Massive Parallel  
592 Sequencing. *Genes (Basel).* 2020;11(8).
- 593 41. Rodriguez AM, Elabd C, Amri EZ, Ailhaud G, and Dani C. The human adipose tissue is a  
594 source of multipotent stem cells. *Biochimie.* 2005;87(1):125-8.
- 595 42. Cummings BS, and Schnellmann RG. Measurement of cell death in mammalian cells. *Curr*  
596 *Protoc Pharmacol.* 2004;Chapter 12:Unit 12 8.
- 597  
598  
599  
600  
601  
602  
603  
604  
605  
606  
607  
608  
609  
610  
611  
612  
613  
614  
615  
616  
617  
618  
619  
620  
621  
622  
623  
624

625

626

627 **Figure 1. Visceral adipose tissue inflammation and fat embolism in COVID-19 subjects**

628 (A) Light microscopy (LM): representative immunohistochemistry of visceral adipose tissue  
629 infiltrated by CD68+ macrophages (in brown); inset shows an enlargement of the squared area. (B)  
630 Visceral adipose tissue adipocytes area, (C) number of CD68+ macrophages per 10<sup>4</sup> adipocytes, and  
631 (D) number of crown-like structures (CLS) per 10<sup>4</sup> adipocytes in COVID-19 vs control subjects.  
632 Asterisk (\*) indicates p<0.05. (E) Transmission electron microscopy (TEM): normal adipocyte  
633 adjacent to a stressed adipocyte showing dilated endoplasmic reticulum (arrows). (F) TEM: dead  
634 adipocytes and interstitial free lipid droplets (\*); arrows indicate adipocytes remnants. (G) TEM: free  
635 lipid droplets of variable size were frequently found in COVID-19 subjects (asterisks). (H)  
636 Enlargement of squared area in G showing lipid droplets inside endothelial cells (arrows). (I) TEM:  
637 enlargement of a capillary from a COVID-19 subject showing a lipid droplet extruding into the  
638 capillary lumen (arrow), note the abundant Weibel-Palade bodies denoting increased blood  
639 hypercoagulability (arrowheads). (J) TEM: a capillary filled with embolic fat near a stressed  
640 adipocyte. (K) LM: mesenteric fat sample showing lipid-rich embolic material in a vein (squared  
641 area, enlarged in inset). Morphometric data are expressed as means±SE.

642 Scale Bar: A=100 µm, E=0,8 µm, F=2,5 µm, G=10 µm, H=3 µm, I=1,5 µm, J=0,8 µm, K= 35 µm.

643

644 **Figure 2. SARS-CoV2 in visceral adipose tissue and hMADS**

645 (A) Transmission electron microscopy (TEM): Vero E6 infected cell showing several virions into the  
646 rough endoplasmic reticulum (RER), some indicated by arrows. Inset: enlargement of squared area.  
647 (B) TEM: adipocyte from the visceral adipose tissue (VAT) depot of a COVID-19 subject showing  
648 several virions into RER (arrows). Inset: enlargement of squared area. (C) TEM: VAT of a COVID-  
649 19 subject showing an adipocyte (Ad) with two large ribosome-like clusters (dotted lines) in the  
650 cytoplasm. (D) Enlargement of squared area in C showing ribosome-like cluster and a virion-like  
651 structure into the dilated RER (arrow). (E) TEM: SARS-CoV2 infected VeroE6 cells showing a  
652 ribosome-like cluster (squared area), enlarged in the inset. (F) SARS-CoV2 infection kinetic in  
653 undifferentiated and differentiated hMADS. SARS-CoV2 genomic RNA detected in the supernatant  
654 at different timepoints, expressed as copies (cps)/ml. (G) SARS-CoV2 quantification in supernatant  
655 and cell pellets of hMADS infected cells. (H) MTT viability assay in SARS-CoV2 infected and  
656 uninfected hMADS adipocytes shows lower cell viability in the first compared to the last at 24- and  
657 96-hours post-infection (p<0.05). (I) Percentage of pyknotic nuclei in hMADS adipocytes at 96h  
658 post-infection compared to uninfected controls (p<0.05). (J) Hoechst nuclear staining showing

659 pyknotic nuclei (arrows) in differentiated hMADS adipocytes. **(K)** Lipid droplets average area ( $\mu\text{m}^2$ )  
660 in differentiated hMADS 96h post infection compared to uninfected controls ( $p < 0.0001$ ). Expression  
661 of putative SARS-CoV2 receptors **(L)** or proteases **(M)** assessed by RT-qPCR and normalized for the  
662 expression of *36B4* mRNA. Expressions were measured in cells that received (red bars) or did not  
663 receive (blue bars) the differentiation cocktail for the indicated number of days. The means  $\pm$  SEM  
664 were calculated from three independent experiments (*ACE2*, *BSG*, *NRP1*, *CSTL*) or four independent  
665 experiments (*FURIN*, *DPP4*), with determinations performed in duplicate (\* $p < 0.05$ , \*\*  $p < 0.01$ ).  
666 Scale Bar: A, B =200 nm, C=500 nm D=100 nm E=180 nm, F=120  $\mu\text{m}$ , G=70  $\mu\text{m}$ , H=5  $\mu\text{m}$ .

667

668 **Figure 3. Embolic lipid droplets and SARS-CoV2 virions in lung of COVID-19 subjects.**

669 **(7)** Light microscopy (LM): representative histochemistry for fat (Oil-Red O) showing the lipid nature  
670 of vacuoles (orange-red) in the vascular lumen (arrows) and lung septa of different COVID-19  
671 subjects. **(E)** LM: resin embedded, toluidine-blue stained tissue. Large free lipid droplets (yellow) are  
672 evident into the capillaries lumen in alveolar septa (arrows). **(F)** Transmission electron microscopy  
673 (TEM): showing lipid droplet (LD) into an alveolar septum mixed with erythrocytes. **(G)** TEM:  
674 alveolar macrophage (M) in a COVID-19 subject. Note: diffuse dilated rough endoplasmic reticulum  
675 (RER) denoting cellular stress (arrows) **(H)** TEM: enlargement of the squared area in G showing two  
676 virions at stages 1-2 and 5 of the reproductive cycle into the dilated RER similar to what observed in  
677 **(I)** TEM: (1 to 5) stages of reproductive cycle of SARS-CoV2 virions in VeroE6 infected cells.  
678 Reference in the main text. Scale Bar: A, B, C=20  $\mu\text{m}$ , D=140  $\mu\text{m}$  E=8  $\mu\text{m}$ , F=1,5  $\mu\text{m}$ , G=1  $\mu\text{m}$ ,  
679 H=70 nm I=65 nm.

680

681 **Figure 4. Oil-Red O-stained lung of COVID-19 subjects showing hyaline membranes**  
682 **morphology and composition**

683 **(A)** Light microscopy (LM): hyaline membranes lining alveolar surfaces (arrows) at low  
684 magnification. **(B)** LM: enlargement of squared area in A showing the microvacuolar nature of ORO+  
685 hyaline membrane (blue arrow). Lipid rich macrophages free in the alveolar space (red arrows) and  
686 inside hyaline membranes (blue arrows) **(C)** LM: vacuolar aspect of ORO+ hyaline membranes'  
687 lipids (arrow and squared area). **(D)** LM: enlargement of squared area in C. Arrows indicate lipid  
688 vacuoles. **(E)** LM: ORO+ large, free lipid vacuole lining the alveolar surface (red arrow) near a  
689 hyaline membrane (blue arrow). **(F)** TEM: free lipid droplet lining the alveolar surface composed by  
690 pneumocytes type II (PT2) with classic surfactant granules (arrow). **(G)** LM: ORO+ lipid vacuole  
691 spreading on the alveolar surface (possible early stage of lipid diffusion). **(H)** LM: ORO+ lipid

692 vacuoles possibly contributing to hyaline membranes development (later stage). Scale Bar: A and E=  
693 50  $\mu\text{m}$ , B=7  $\mu\text{m}$ , C=10  $\mu\text{m}$ , D=2  $\mu\text{m}$ , F=3  $\mu\text{m}$ , G=25  $\mu\text{m}$ , H=35  $\mu\text{m}$ .

694

695 **Suppl. Fig.1: Representative transmission electron microscope images of visceral adipose tissue**  
696 **from COVID-19 subject**

697 (A) Rough endoplasmic reticulum (RER) confronting cisternae in endothelial cell (arrowhead in A,  
698 enlarged in inset). (B) RER confronting cisternae in endothelial cell comparable to those found in  
699 infected VeroE6 cells (compare with E). (C) Ribosome-lamella complex in a capillary (arrow,  
700 enlarged in upper inset). (D) Annulate lamellae found in a lung's macrophage. (E) RER confronting  
701 cisternae in SARS-CoV2 -infected Vero-E6 cell. (F) Light microscopy of differentiated hMADS  
702 extruding lipid-like material. (G) Toluidine staining of an hMADS cell extruding a lipid vacuole  
703 (resin-embedded). (H) Quantitative analyses of the amount of material extruded from the cell in  
704 SARS-CoV2 infected and uninfected hMADS. Ad: adipocyte. Scale bar: A=0,8  $\mu\text{m}$ , B=120 nm,  
705 C=1,2  $\mu\text{m}$ , D= 200 nm, E=40 nm.

706 **Suppl. Fig. 2 Schematic representation of the prevalence of fat embolism (FE) and lipidic**  
707 **hyaline membranes (HM) in the study population.** Weight status *i.e.*, OW-OB: overweight and  
708 obese subjects with BMI: body mass index ( $\text{kg}/\text{m}^2 \geq 25$ ); NW: normo-weight subjects with  $\text{BMI} \leq 25$ .  
709 Number of patients for each category is reported in parenthesis.

710 **Suppl. Fig. 3 Fat embolic features in liver of three different COVID-19 subjects with**  
711 **documented lung fat embolism.** (A) Focal, macrovesicular steatosis evidenced by Oil-Red O  
712 staining (ORO). (B) Several ORO+ lipid droplets into sinusoids (arrows). (C) Portal area  
713 enlargement of subject shown in B. Note the large lipid droplets into the portal vein lumen (arrow).  
714 (D) Cluster of lipid rich vacuoles (arrow), like the one found in the mesenteric adipose tissue vein  
715 shown in Fig.1K. Scale bar: A=10 mm, B=7 mm, C=8mm, D=13 mm.

716

717



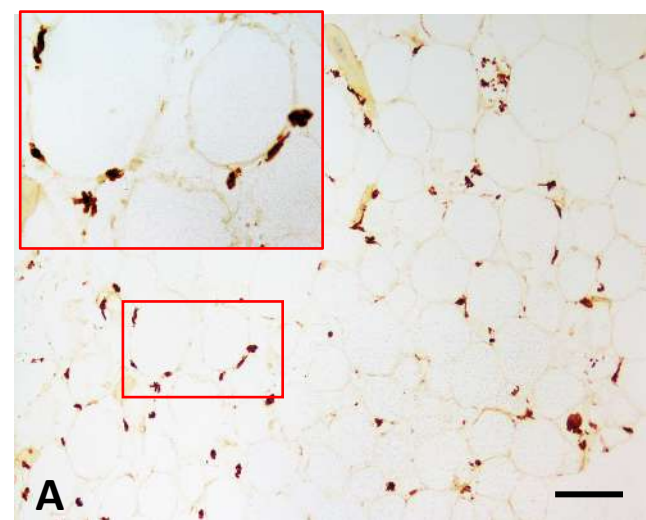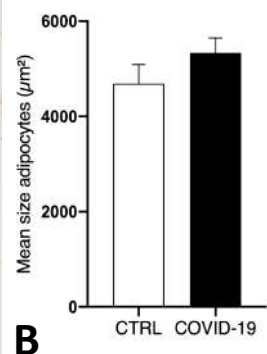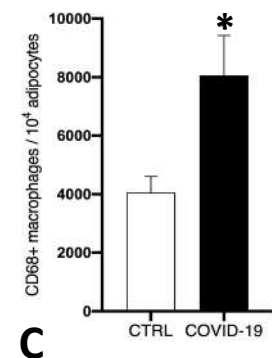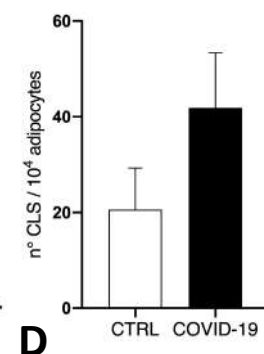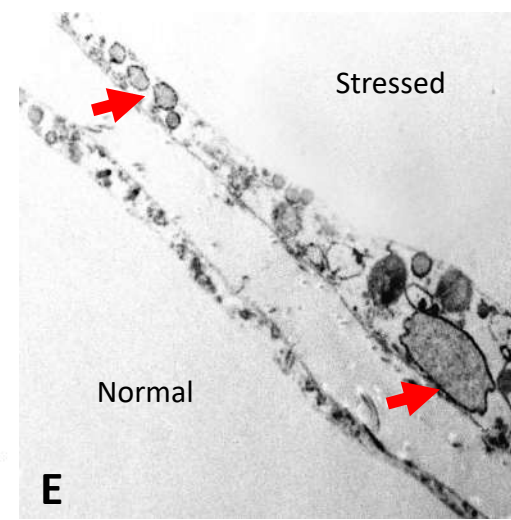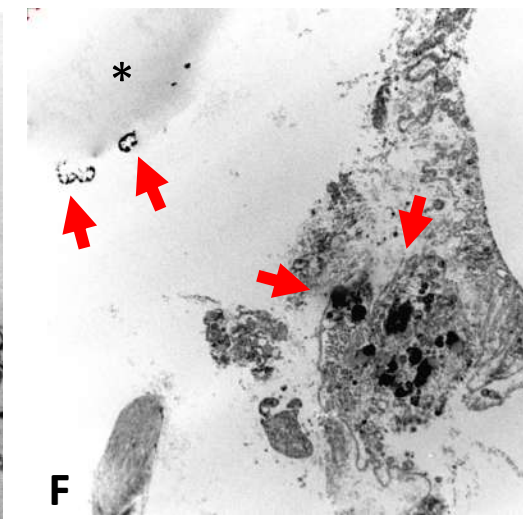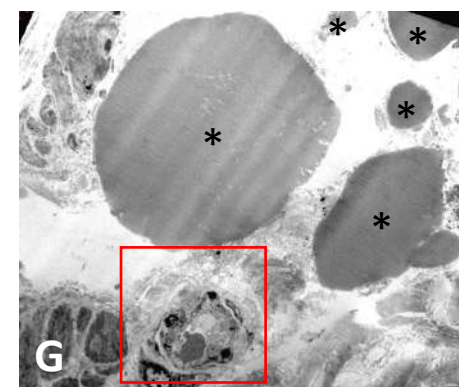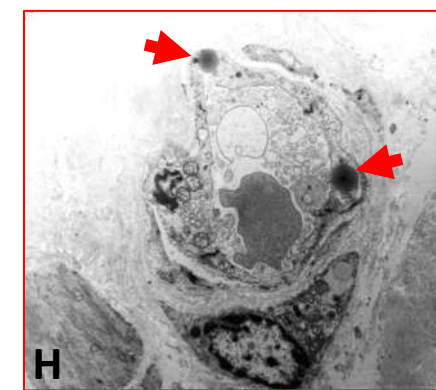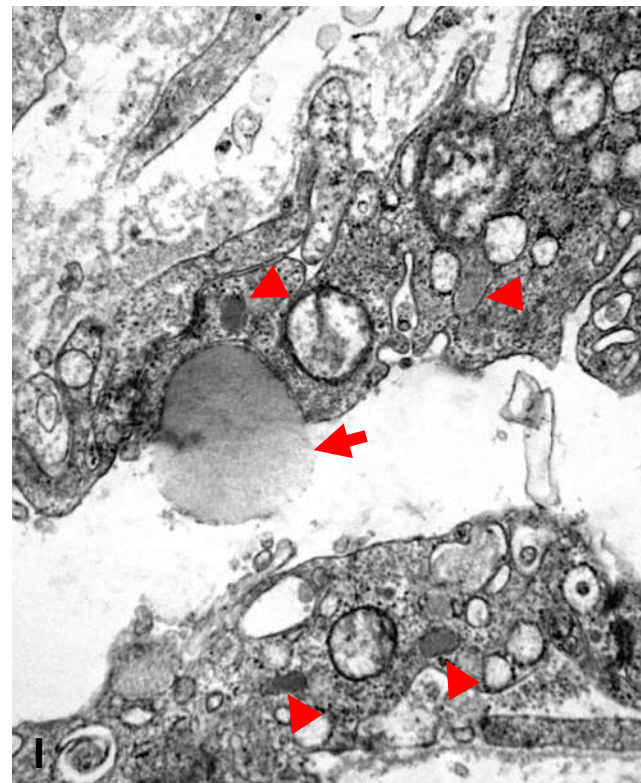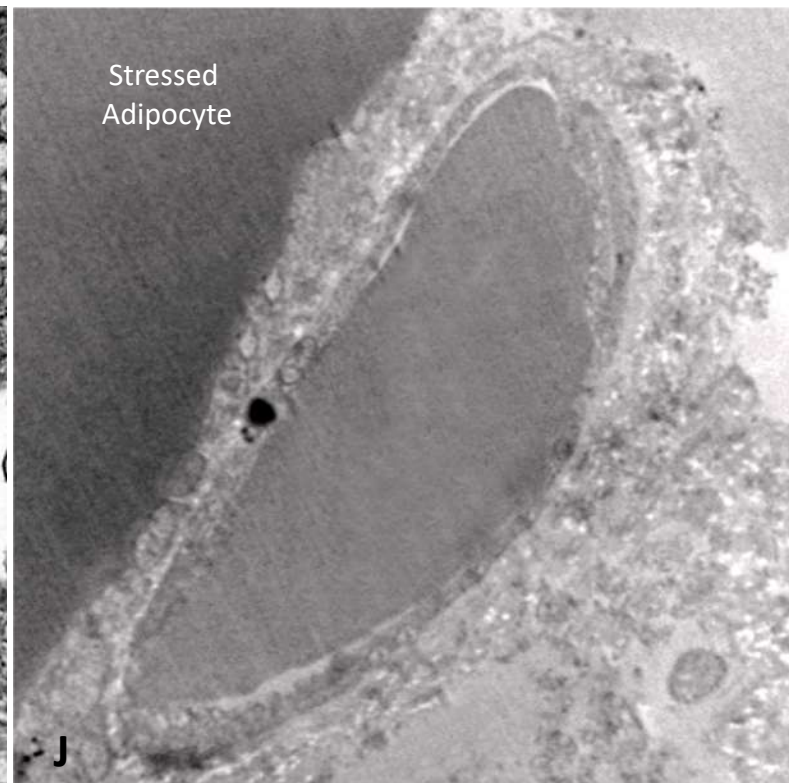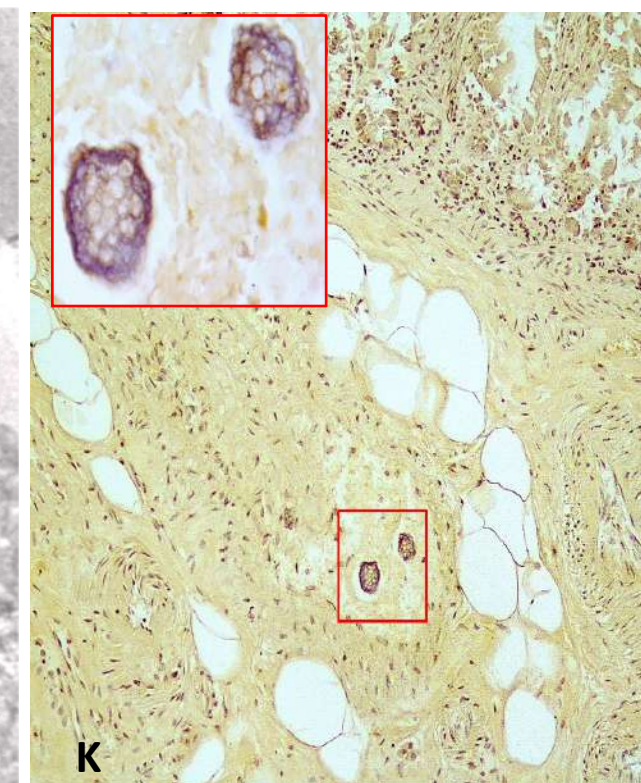

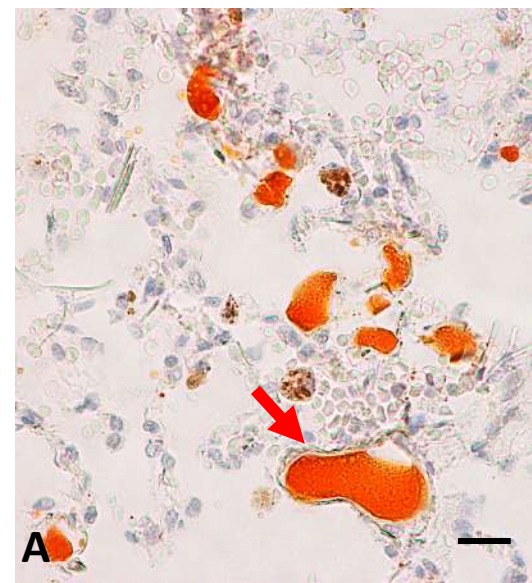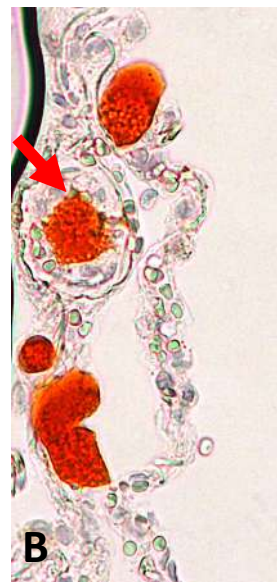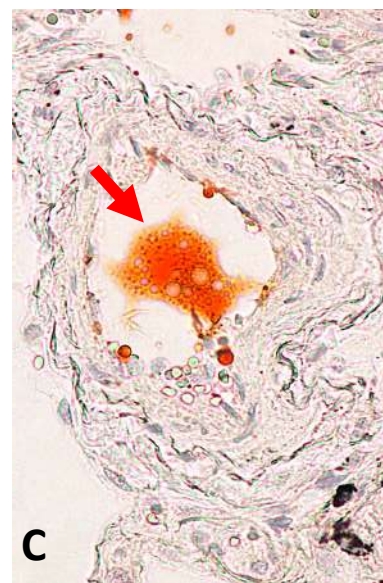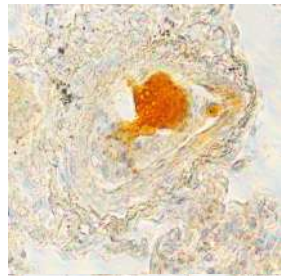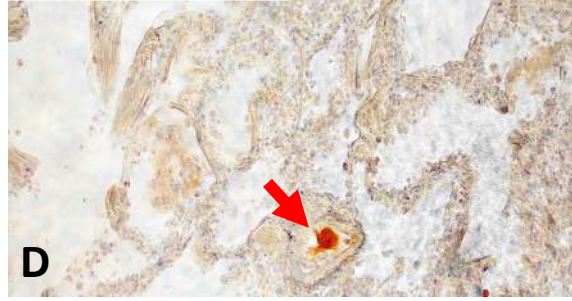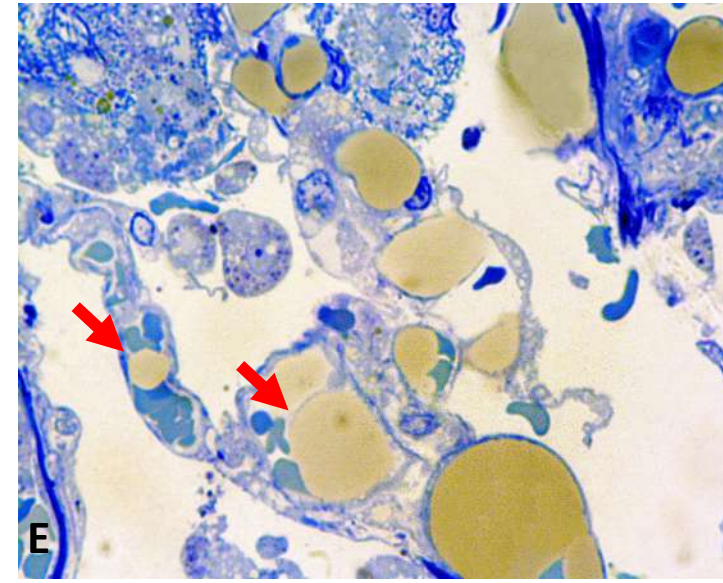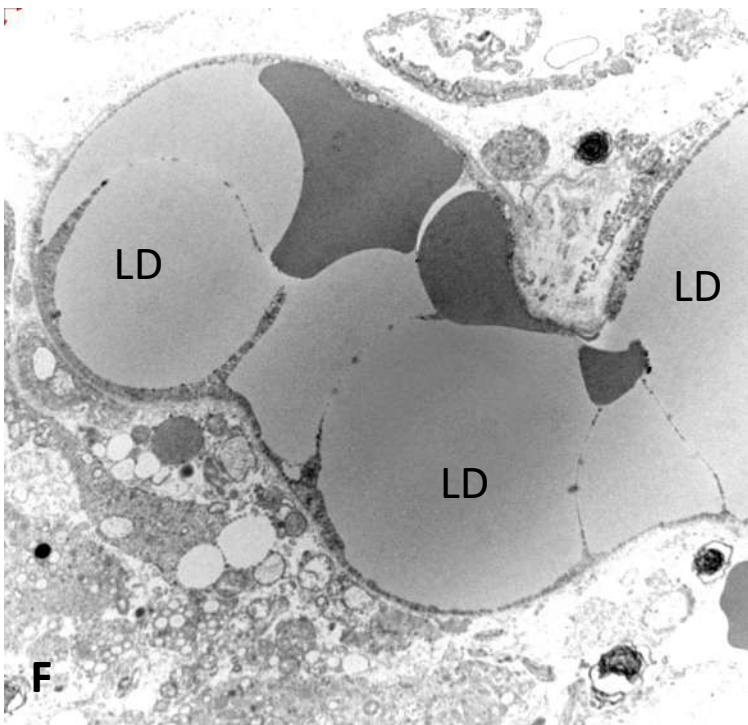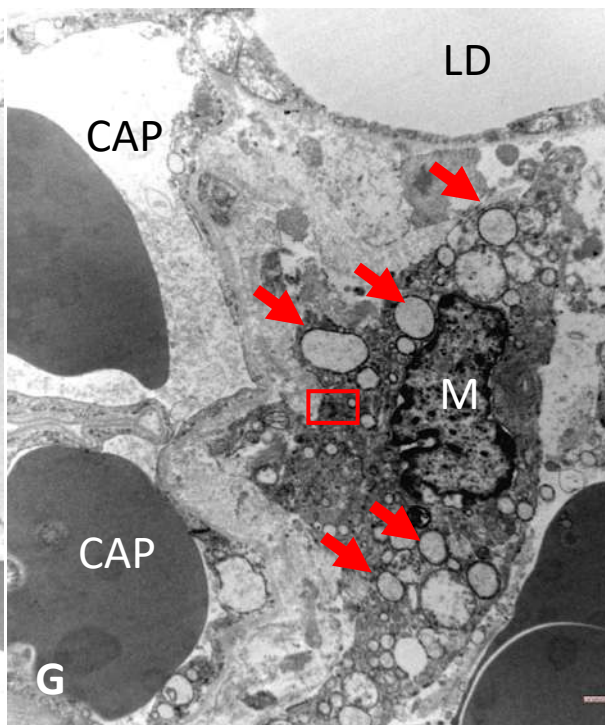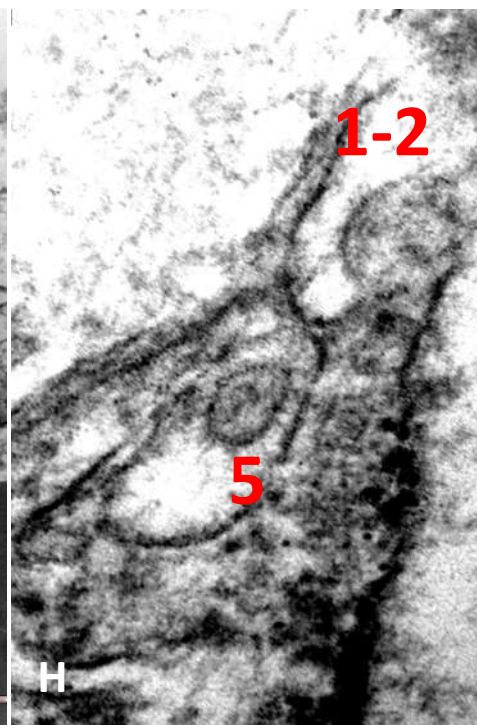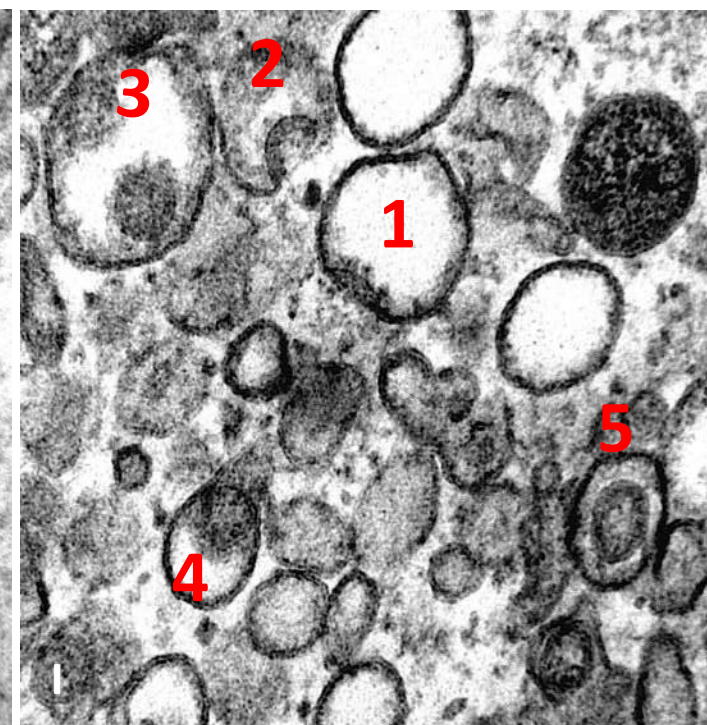

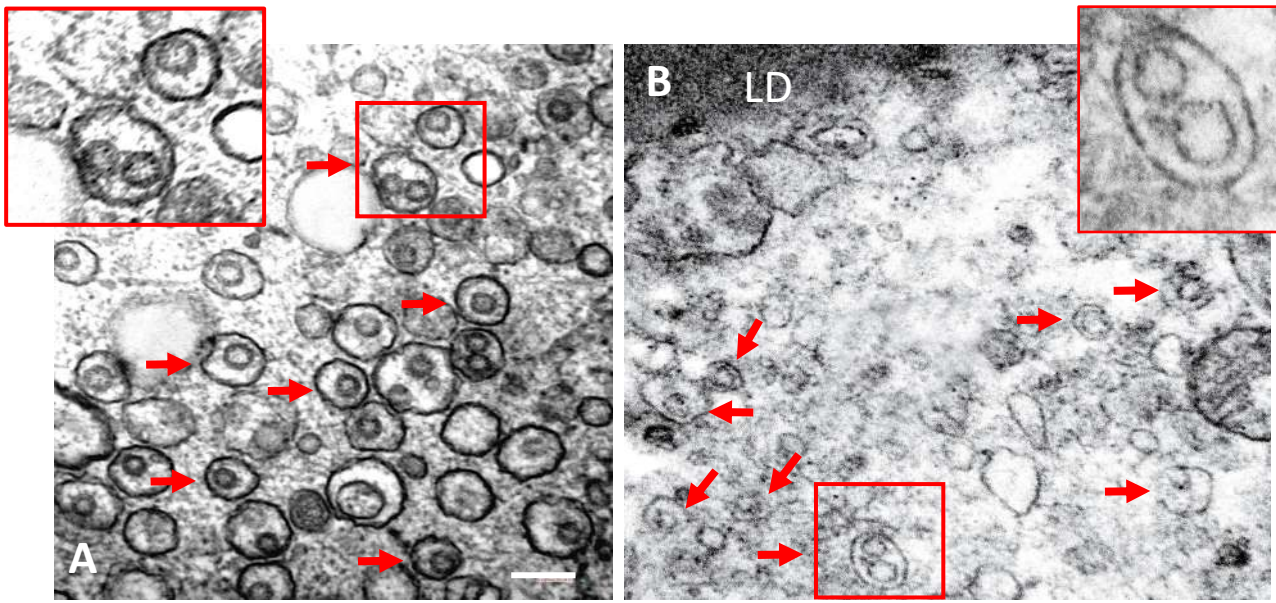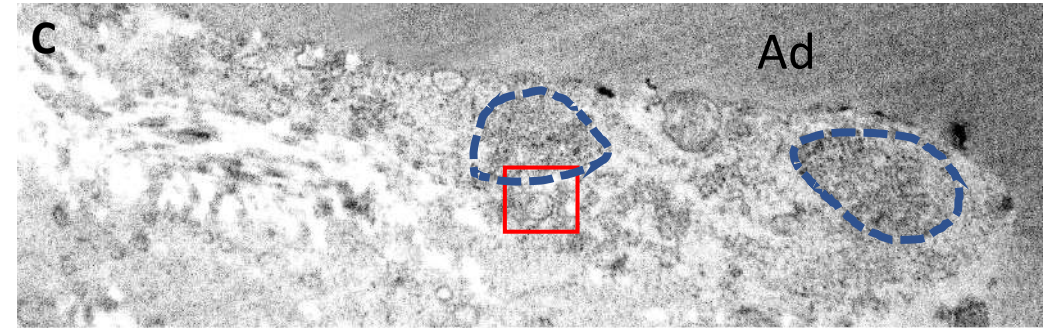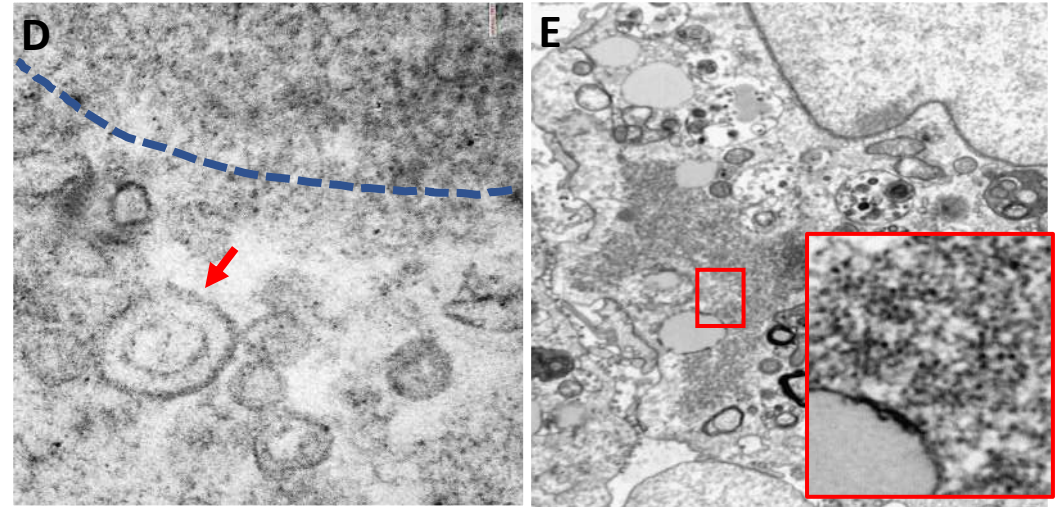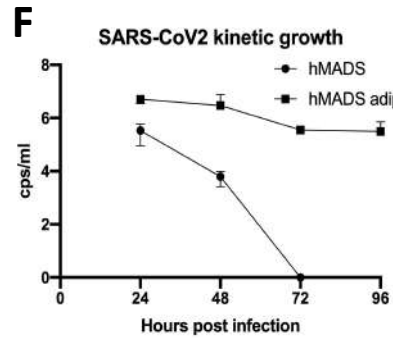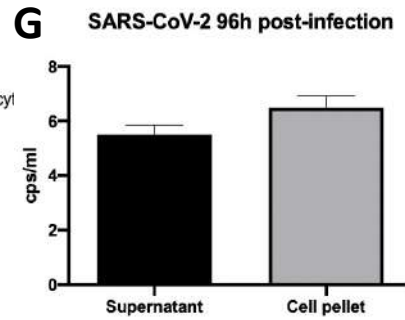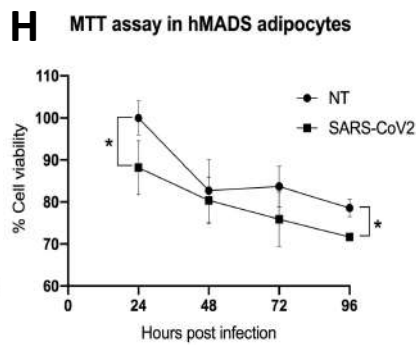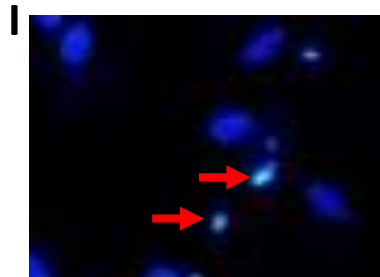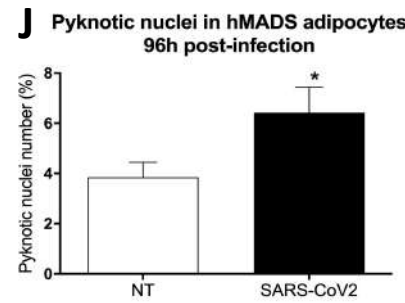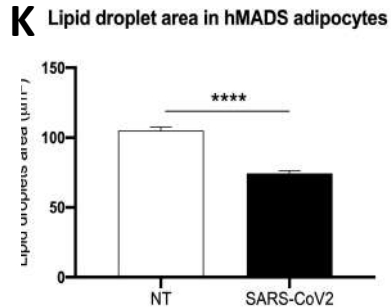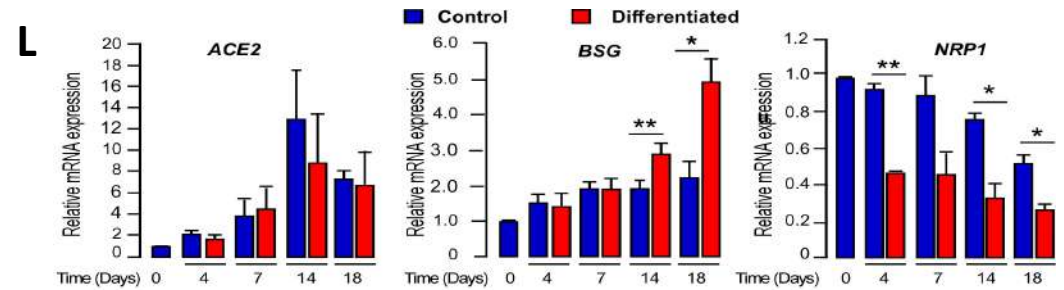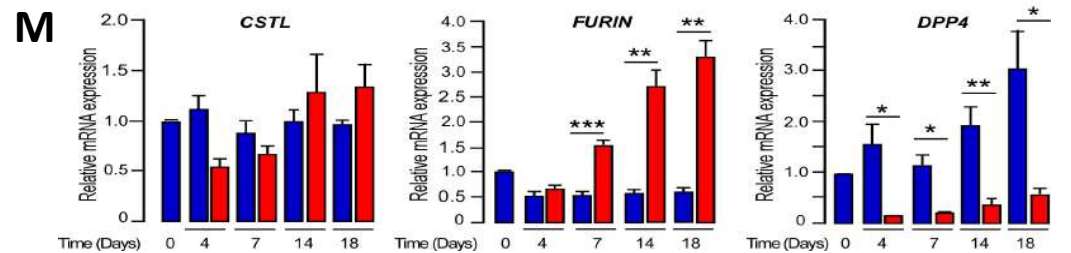

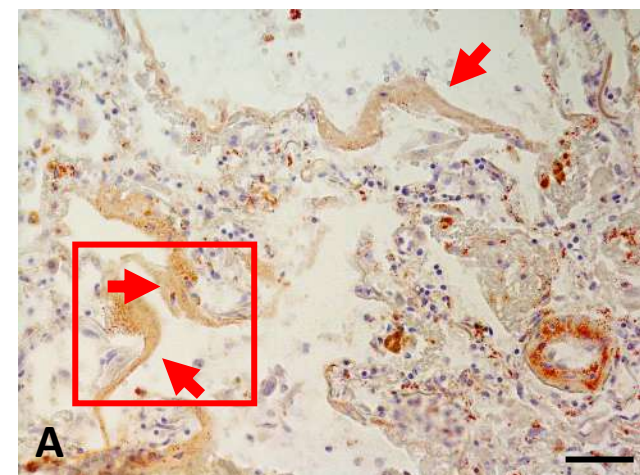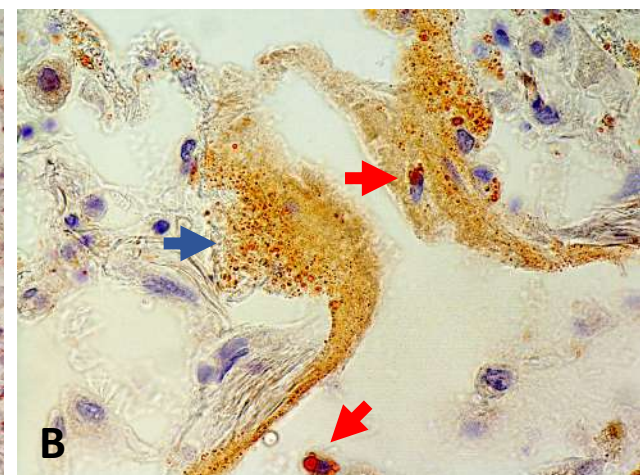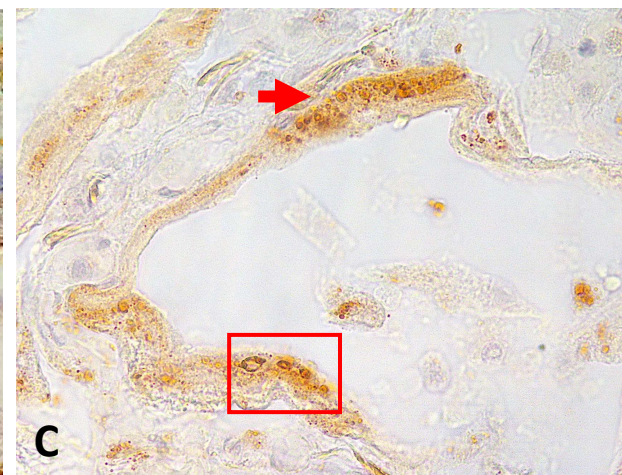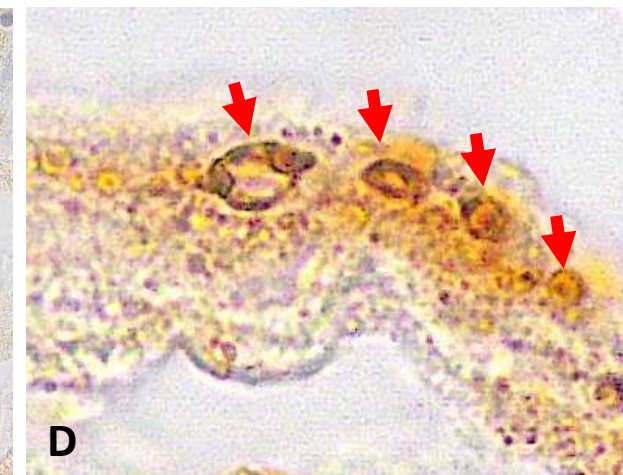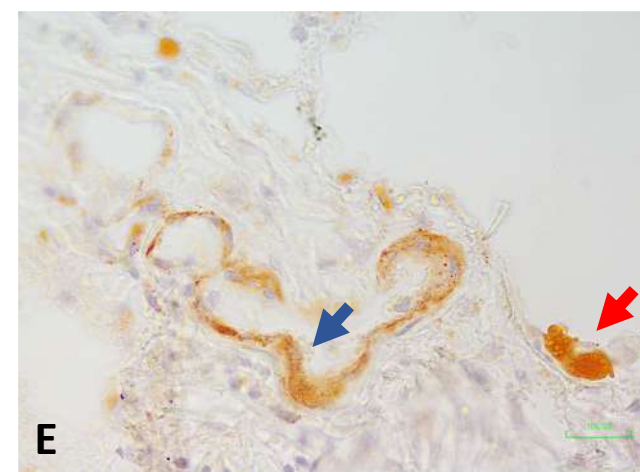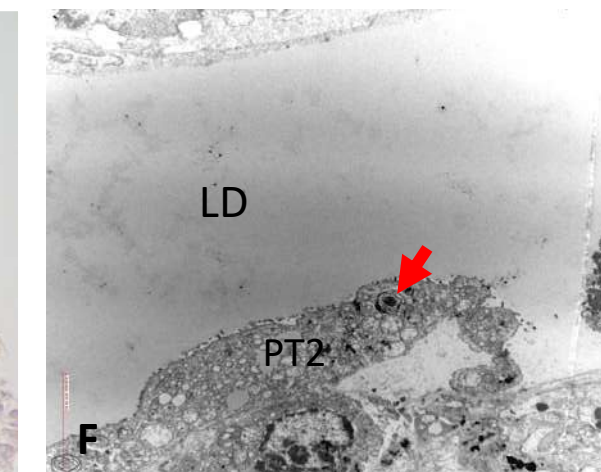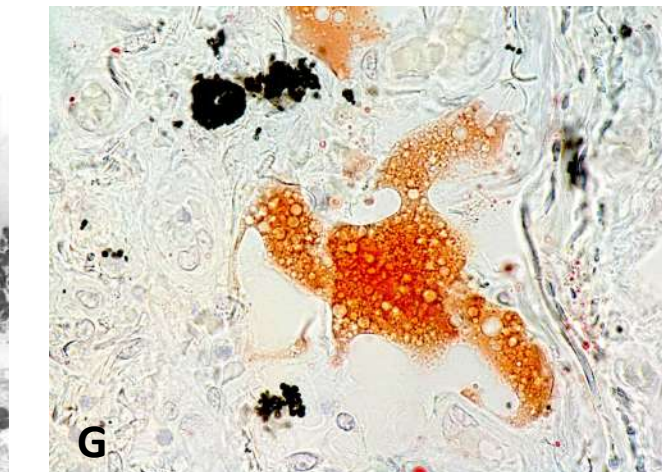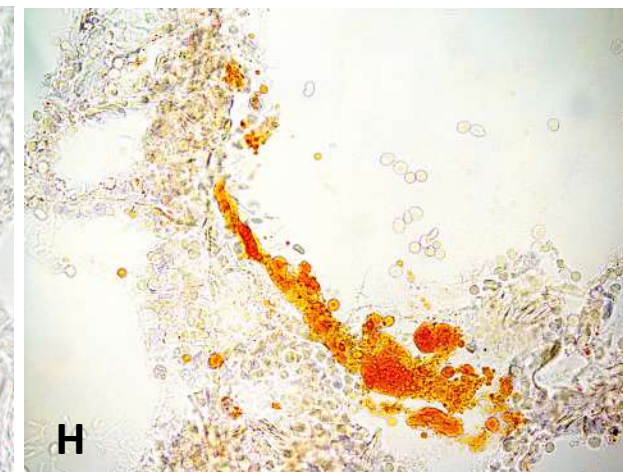

Source: https://biorxiv.org/content/10.1101/2021.10.30.466586v1.full.pdf
